# Supplementary material
Source: publisher site journal article supplement (https://e-cmh.org/upload/media/cmh-2024-0060-Supplementary-Fig-1.pdf)
Supplement: Supplementary file 1 [file cmh-2024-0060-Supplementary-Fig-1.pdf]

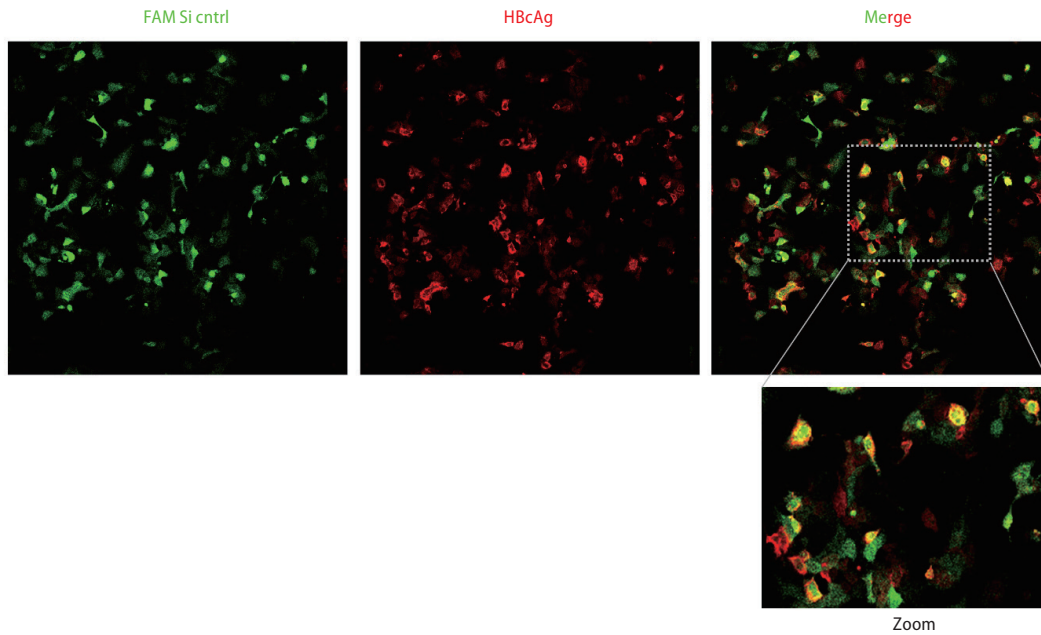

**Supplementary Figure 1.** Immunofluorescence analysis of the co-expression of HBV 1.2-mer and FAM-negative control siRNA in the same hepatocytes. Magnification,  $\times 10$ ; scale bar, 20  $\mu\text{m}$ . The two constructs were co-transfected into the Huh7 cells. Sections were prepared after cell fixation and HBcAg staining. Green and red fluorescence signals were observed with a confocal laser scanning microscope.
